# Supplementary material for: FAM111 protease activity undermines cellular fitness and is amplified by gain‐of‐function mutations in human disease
Source: PubMed Central journal article supplement (PMC7534640; doi:10.15252/embr.202050662), 2020-08-09
Supplement: EMBR-21-e50662-s001.pdf [file EMBR-21-e50662-s001.pdf]

## Table of contents

|                                 |    |
|---------------------------------|----|
| <b>Appendix Figure S1</b> ..... | 2  |
| <b>Appendix Figure S2</b> ..... | 4  |
| <b>Appendix Figure S3</b> ..... | 6  |
| <b>Appendix Figure S4</b> ..... | 8  |
| <b>Appendix Figure S5</b> ..... | 10 |
| <b>Appendix Figure S6</b> ..... | 12 |

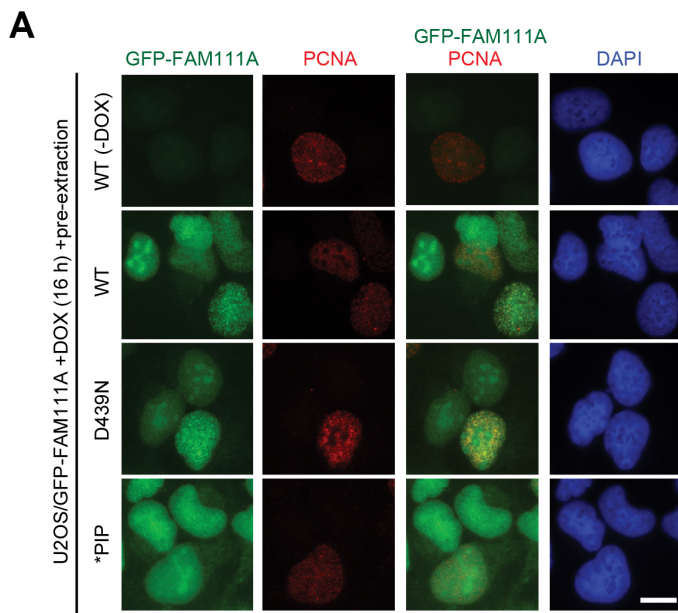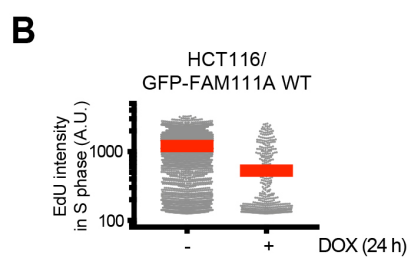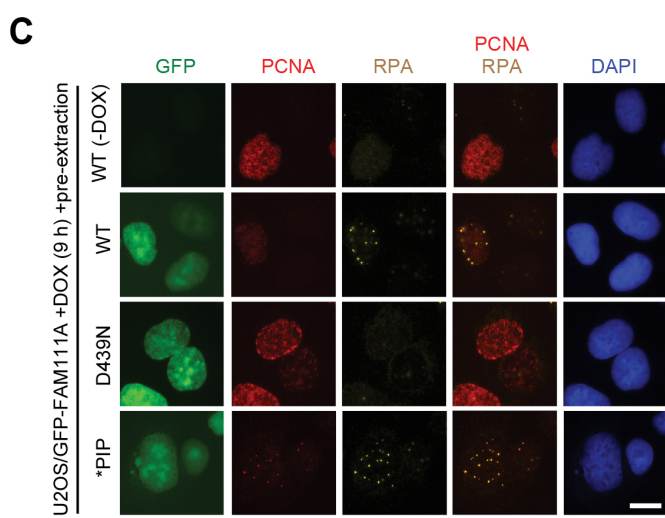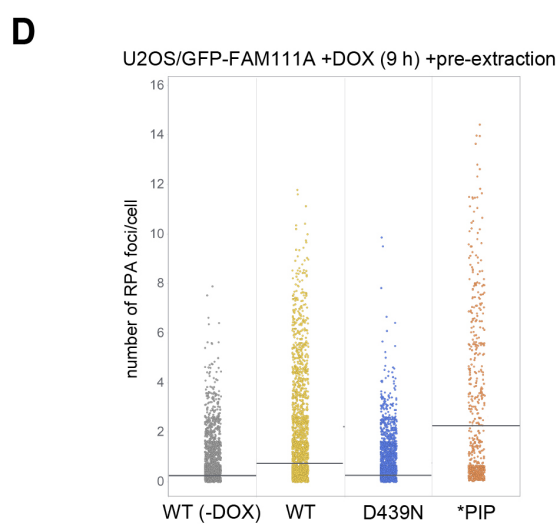

**Appendix Figure S1.**

**Elevated FAM111A proteolytic activity impairs DNA replication and triggers replication stress**

**A.** Representative images of U2OS/GFP-FAM111A cell lines that were treated or not with DOX, fixed and stained with PCNA antibody. Mutation of the PIP box abrogates FAM111A localization to PCNA-positive DNA replication foci. **B.** DNA replication rates in HCT116/GFP-FAM111A WT cells treated or not with DOX, pulse-labeled with EdU and stained with DAPI were analyzed by quantifying EdU signal intensity in S phase cells using QIBC ( $n > 500$  cells per condition; red bars, mean (A.U., arbitrary units)). **C.** As in (A), except that cells were co-stained with PCNA and RPA2 antibodies. **D.** Quantification of data in (C) (grey bars, average;  $n > 2000$  cells per condition). Scale bars, 10  $\mu\text{m}$ .

Data **(A-D)** are representative of three independent experiments with similar outcomes.

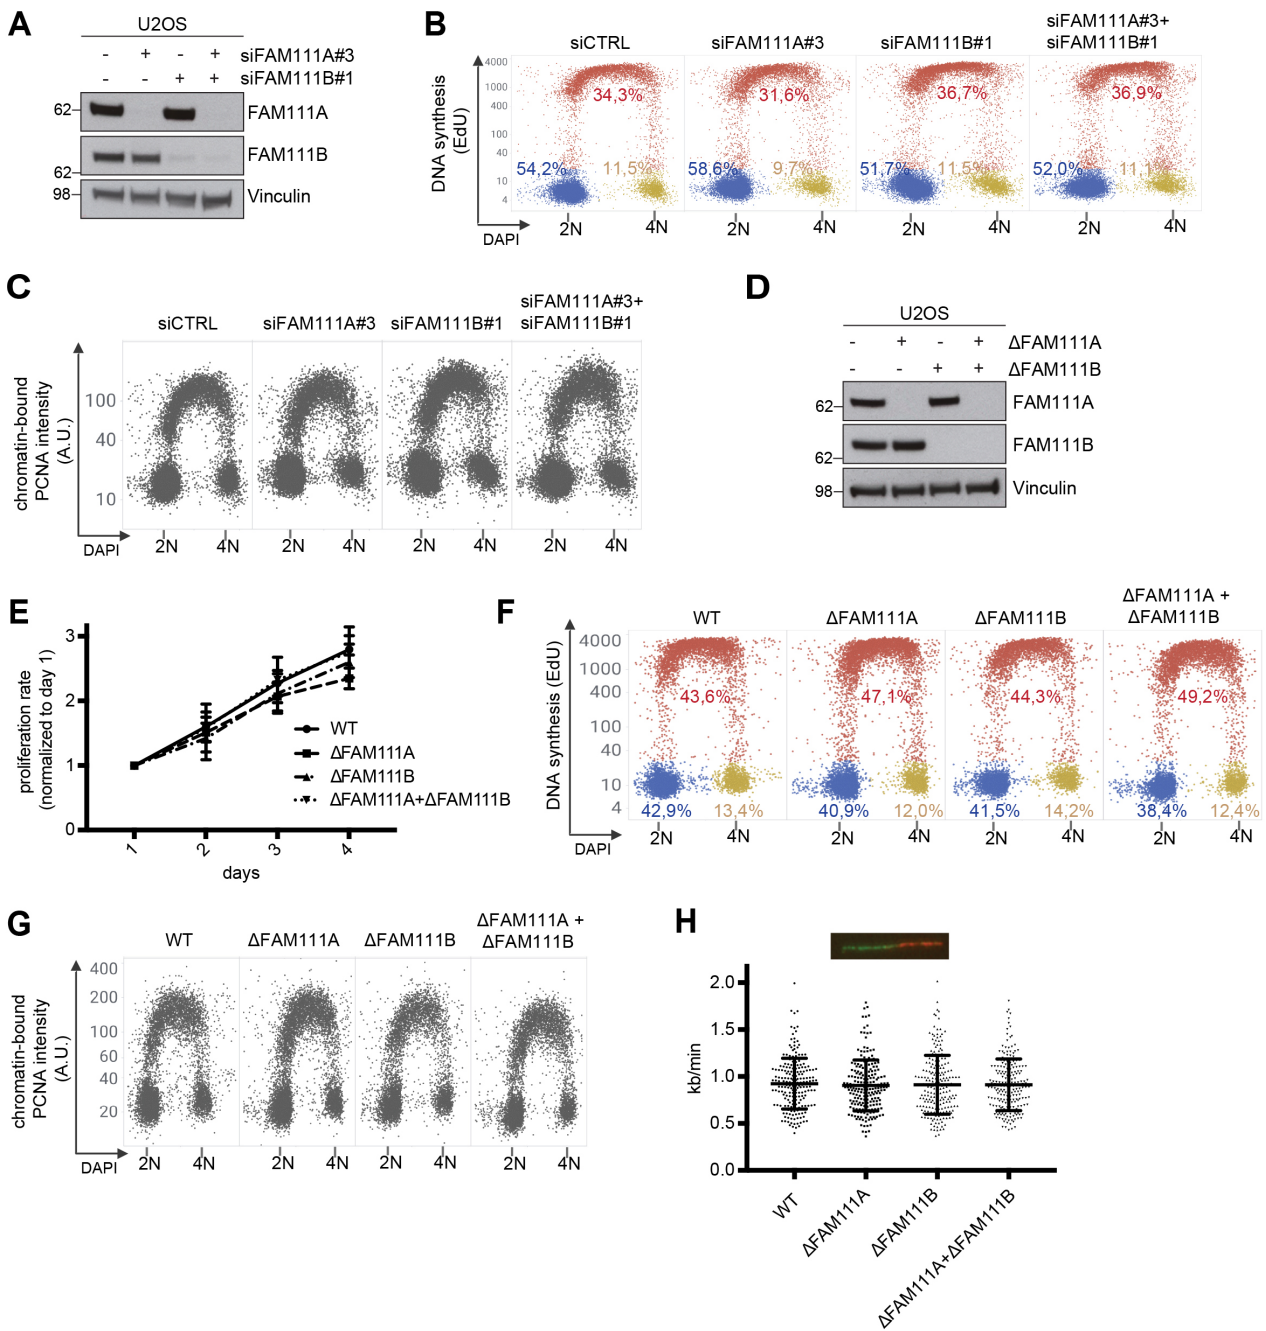

## Appendix Figure S2.

### **FAM111A and FAM111B are dispensable for DNA replication and cell proliferation**

**A.** Immunoblot analysis of U2OS cells transfected with indicated siRNAs. **B.** Cells in (A) were pulse-labeled with EdU, fixed and stained with DAPI. Cells were then subjected to QIBC analysis for quantification of EdU and DAPI signal intensities ( $n > 2000$  cells per condition). Proportion of cells in G1 (blue), S (red) and G2/M (yellow) phases is indicated. **C.** Cells in (A) were fixed and stained with PCNA antibody and DAPI. Cells were then subjected to QIBC analysis for quantification of PCNA and DAPI signal intensities ( $n > 2000$  cells per condition). **D.** Immunoblot analysis of U2OS cells and derivative lines with targeted knockout of *FAM111A* and/or *FAM111B*. **E.** Proliferation of cell lines in (D) was determined by quantification of Resazurin incorporation (mean $\pm$ s.d.;  $n=3$  independent experiments). **F.** As in (B), but using U2OS cell lines with targeted knockout of *FAM111A* and/or *FAM111B*. **G.** As in (C), but using U2OS cell lines with targeted knockout of *FAM111A* and/or *FAM111B*. **H.** DNA fiber analysis of indicated U2OS cell lines labeled with CldU (25min; red) followed by IdU (25min; green). Fork speeds were calculated as length of labeled track divided by pulse time (black bars, median $\pm$ s.d.; at least 200 fibers analysed per condition). A representative fiber image is shown. Data (**A-H**) are representative of three independent experiments with similar outcomes.

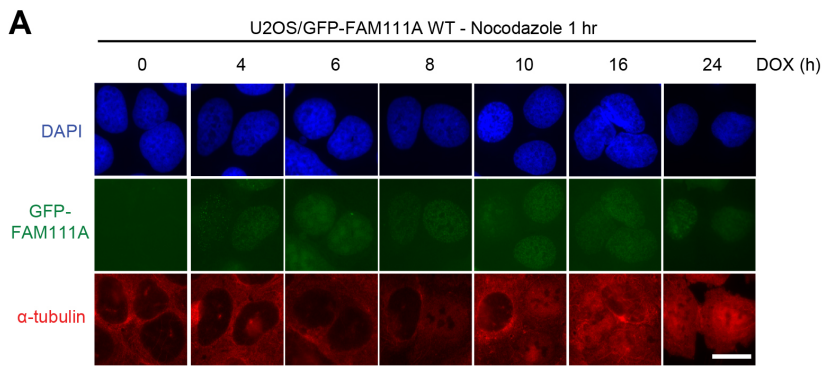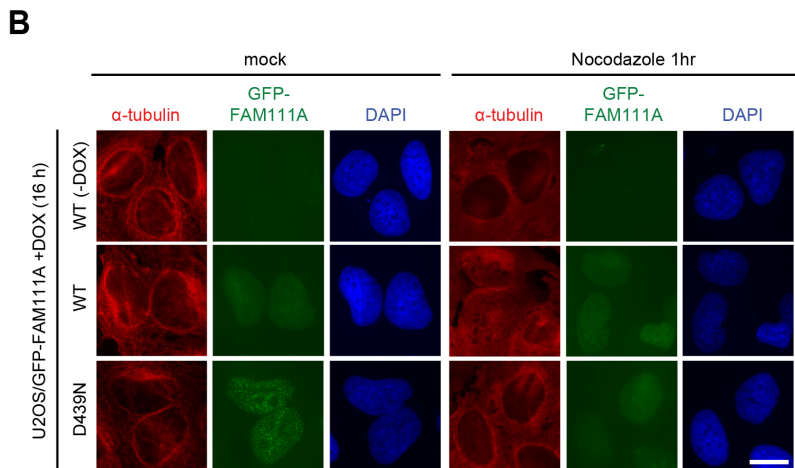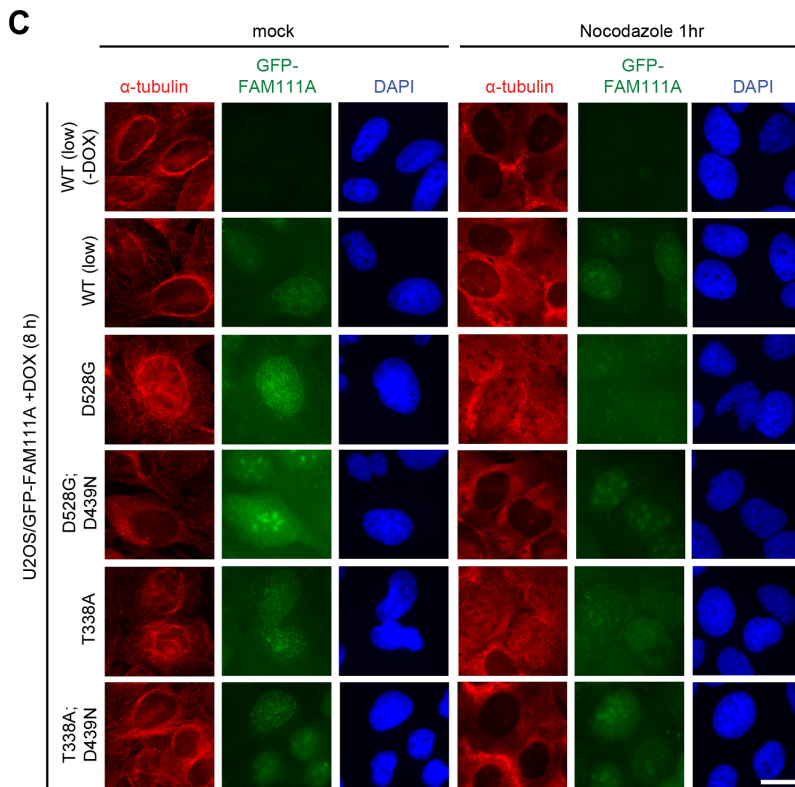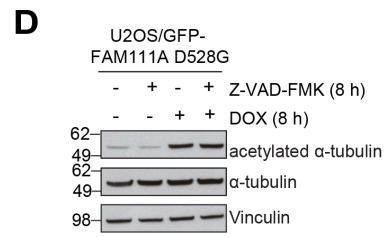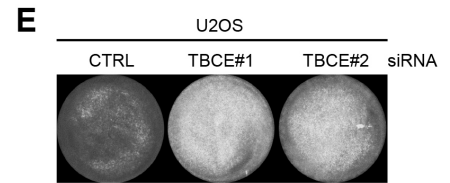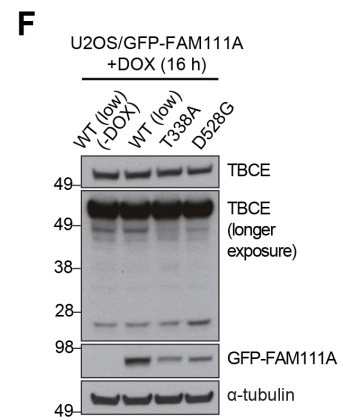

### **Appendix Figure S3.**

#### **Elevated FAM111A protease activity disrupts microtubule organization**

**A-C.** Representative images of U2OS/GFP-FAM111A cell lines that were treated or not with DOX for the indicated times, then left untreated or exposed to nocodazole for 1 h, and fixed and stained with  $\alpha$ -tubulin antibody. Note that cells with elevated FAM111A protease activity display accumulation of nuclear  $\alpha$ -tubulin. **D.** Immunoblot analysis of U2OS/GFP-FAM111A D528G cells treated with DOX and Z-VAD-FMK for 8 h, as indicated. **E.** U2OS cells were transfected with the indicated siRNAs, fixed 4 days later and stained with crystal violet. **F.** Immunoblot analysis of U2OS/GFP-FAM111A cell lines that were left untreated or induced with DOX for 16 h. Scale bars, 10  $\mu$ m.

Data are representative of three (**A-C**) and two (**D-F**) independent experiments with similar outcomes.

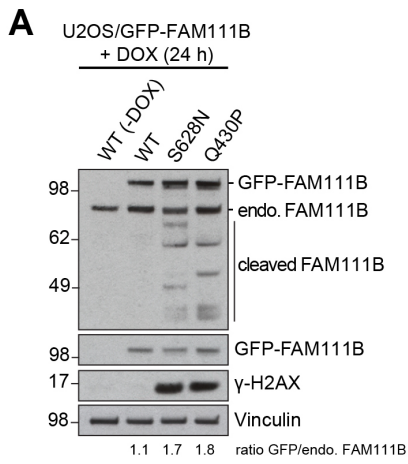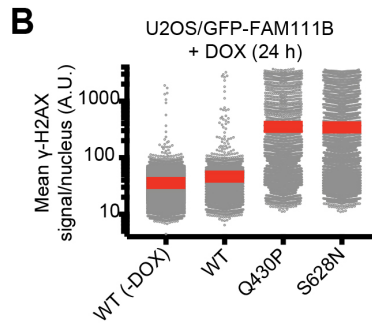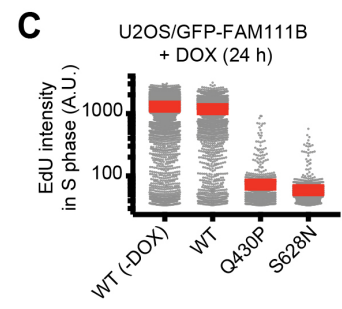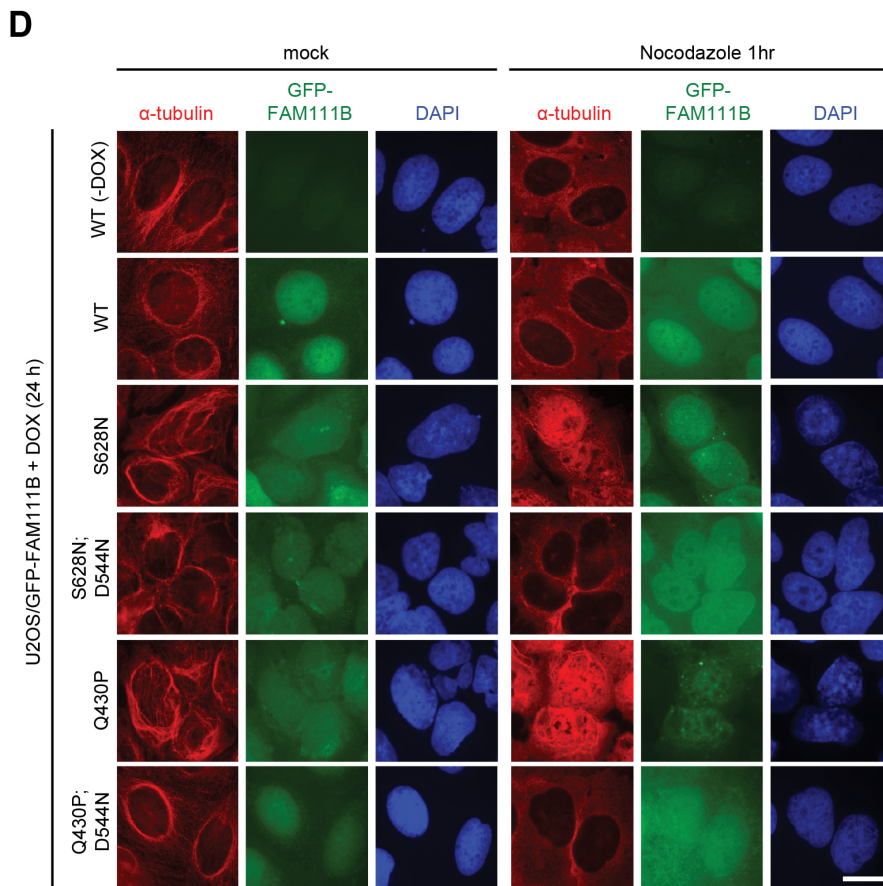



**Appendix Figure S4.**

**Patient-associated FAM111B mutants trigger DNA replication suppression, apoptosis onset and microtubule network disruption in a protease-dependent manner**

**A.** Immunoblot analysis of U2OS/GFP-FAM111B cell lines left untreated or induced with DOX for 24 h to induce expression of WT or disease-associated GFP-FAM111B alleles. **B.** Cells treated as in (A) were fixed, stained with  $\gamma$ -H2AX antibody and DAPI, and  $\gamma$ -H2AX signal intensity was analyzed by QIBC (red bars, mean;  $n > 2000$  cells per condition; A.U., arbitrary units). **C.** Cells treated as in (A) were labeled with EdU, fixed and stained with DAPI. EdU signal intensity was analyzed by QIBC (red bars, mean;  $n > 2000$  cells per condition). **D.** Representative images of U2OS/GFP-FAM111B cell lines that were treated or not with DOX, then left untreated or exposed to nocodazole for 1 h, and fixed and stained with  $\alpha$ -tubulin antibody. Scale bar, 10  $\mu$ m. Data (**A-D**) are representative of three independent experiments with similar outcomes.

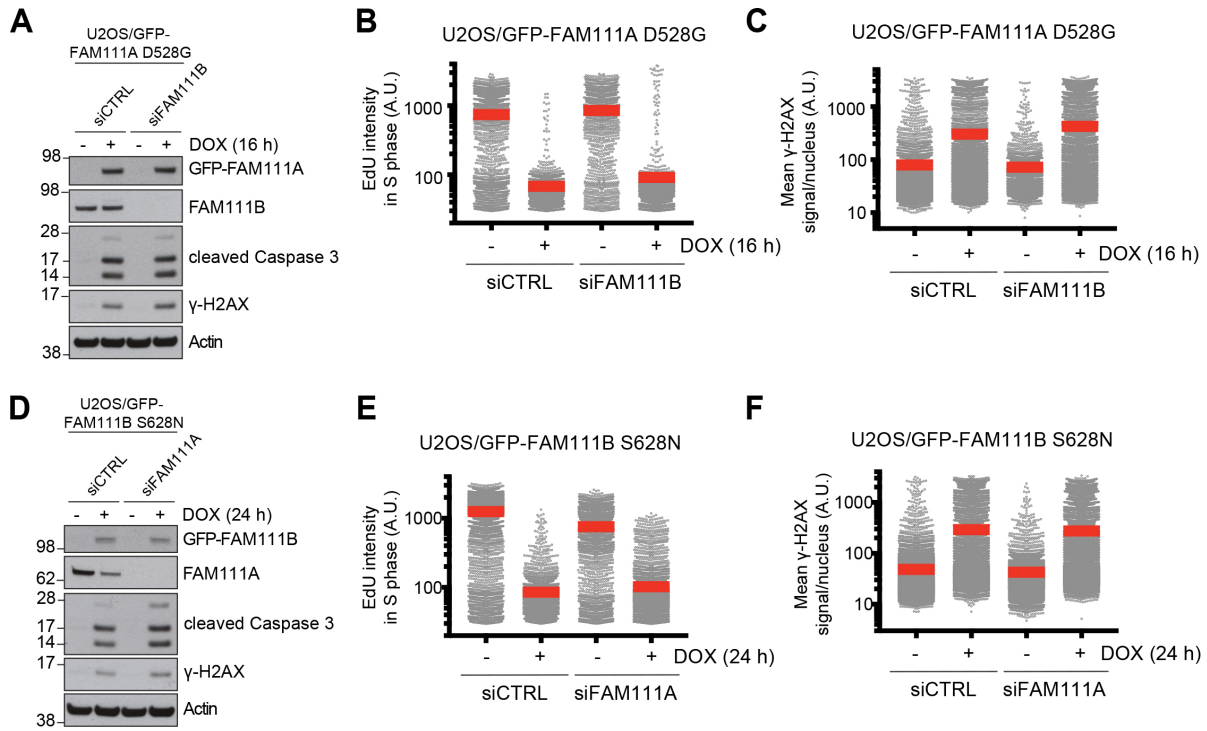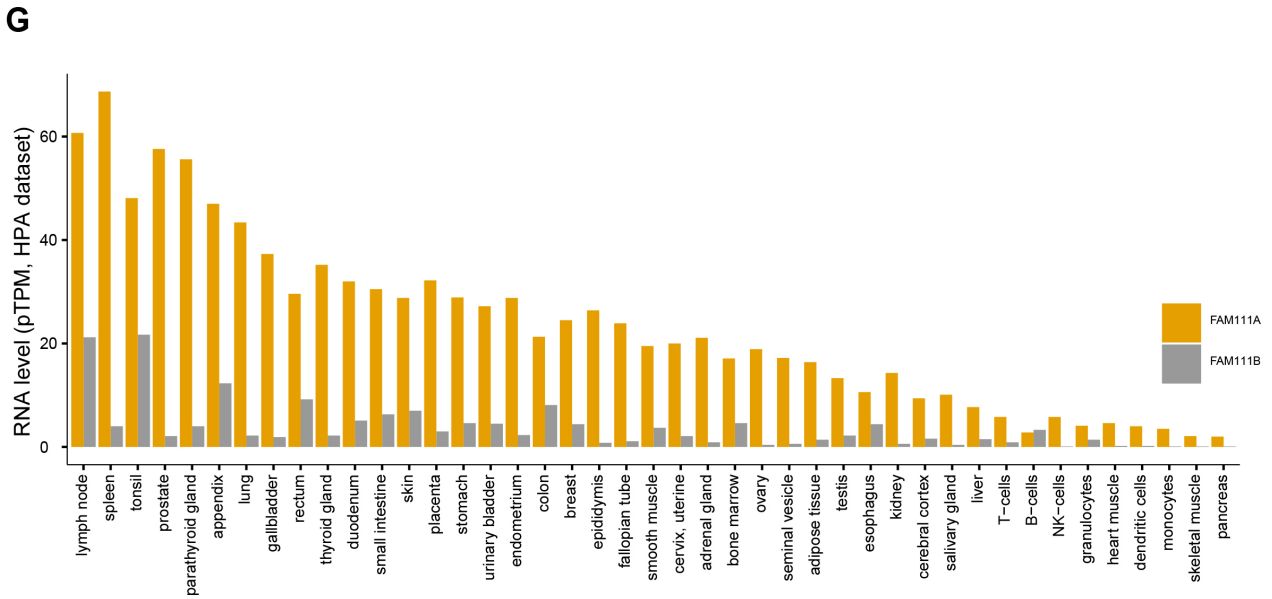

**Appendix Figure S5.**

**FAM111A and FAM111B are differentially expressed in human tissues and impact DNA replication and apoptosis independently of each other**

**A.** Immunoblot analysis of U2OS/GFP-FAM111A D528G cells transfected with control (CTRL) or FAM111B siRNAs, and subsequently left untreated or exposed to DOX. **B.** Cells treated as in (A) were pulse-labeled with EdU, stained with DAPI and analyzed for DAPI and EdU signal intensity using QIBC ( $n > 2000$  cells per condition; A.U., arbitrary units). **C.** Cells treated as in (A) were fixed, stained with  $\gamma$ -H2AX antibody and DAPI, and  $\gamma$ -H2AX signal intensity was analyzed by QIBC (red bars, mean;  $n > 2000$  cells per condition). **D.** Immunoblot analysis of U2OS/GFP-FAM111B S628N cells transfected with control (CTRL) or FAM111A siRNAs, and subsequently left untreated or exposed to DOX. **E.** Cells treated as in (D) were pulse-labeled with EdU, stained with DAPI and analyzed for DAPI and EdU signal intensity using QIBC ( $n > 2000$  cells per condition). **F.** Cells treated as in (D) were fixed, stained with  $\gamma$ -H2AX antibody and DAPI, and  $\gamma$ -H2AX signal intensity was analyzed by QIBC (red bars, mean;  $n > 2000$  cells per condition). **G.** Human Protein Atlas RNA-seq data on *FAM111A* and *FAM111B* transcript expression levels in 37 human tissues (pTPM, protein transcripts per million).

Data **(A-F)** are representative of three independent experiments with similar outcomes.

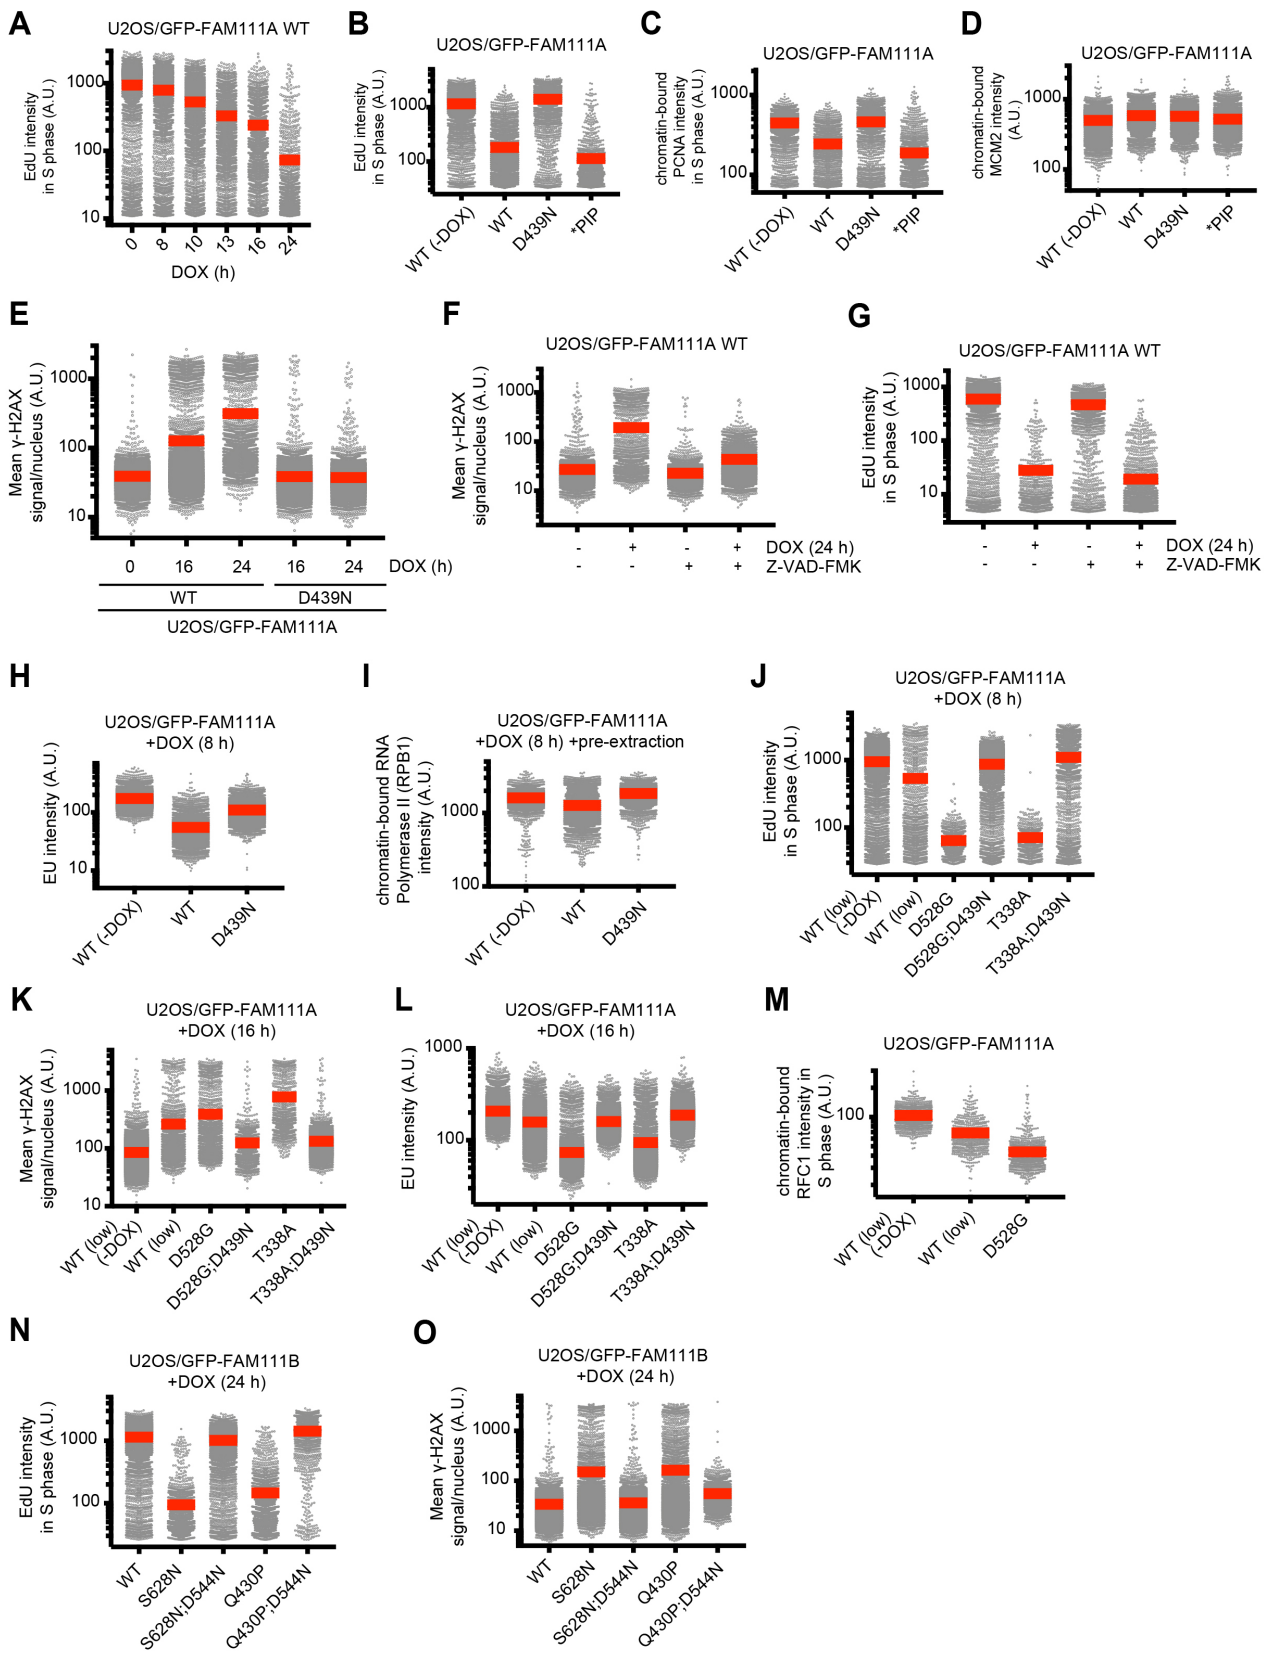

## Appendix Figure S6.

### Independent replicates of quantitative image-based cytometry (QIBC) experiments

**A.** Biological replicate of Figure 2B (red bars, mean (A.U., arbitrary units);  $n > 2000$  cells per condition). **B.** Biological replicate of Figure 2D (red bars, mean;  $n > 2000$  cells per condition). **C.** Biological replicate of Figure 2E (red bars, mean;  $n > 2000$  cells per condition). **D.** Biological replicates of Figure 2F (red bars, mean;  $n > 2000$  cells per condition). **E.** Biological replicate of Figure 3C (red bars, mean;  $n > 2000$  cells per condition). **F.** Biological replicate of Figure EV3B ( $n > 2000$  cells per condition; red bars, mean). **G.** Biological replicate of Figure EV3E ( $n > 1000$  cells per condition). **H.** Biological replicate of Figure 3G (red bars, mean;  $n > 2000$  cells per condition). **I.** Biological replicate of Figure 3I (red bars, mean;  $n > 2000$  cells per condition). **J.** Biological replicate of Figure 4D (red bars, mean;  $n > 2000$  cells per condition). **K.** Biological replicate of Figure EV4I (red bars, mean;  $n > 2000$  cells per condition). **L.** Biological replicate of Figure 4F (red bars, mean;  $n > 2000$  cells per condition). **M.** Biological replicate of Figure EV4J (red bars, mean;  $n > 2000$  cells per condition). **N.** Biological replicate of Figure 5G (red bars, mean;  $n > 2000$  cells per condition). **O.** Biological replicate of Figure 5K (red bars, mean;  $n > 2000$  cells per condition).
